# Supplementary material for: In situ synthesis of 3D ZIF-8 on 2D MXene nanosheets for efficient photocatalytic degradation of methylene blue (MB)
Source: Royal Society of Chemistry journal article supplement (doi:10.1039/d5ma00340g), 2025-01-01
Supplement: d5ma00340g1.pdf [file d5ma00340g1.pdf]

## Supporting Information for

### In-Situ Synthesis of 3D ZIF-8 on 2D MXene Nanosheets for Efficient Photocatalytic Degradation of Methylene Blue (MB)

**Francis Ashamary,<sup>a,b#</sup> P. Catherine Neba,<sup>a,b#</sup> S. Harivarsha,<sup>a,b#</sup> Atchudan Raji,<sup>c,d#</sup>  
Padmanaban Annamalai,<sup>e,f</sup> Mohamed Gamal Mohamed,<sup>g,h#\*</sup> Pramod  
Kalambate,<sup>i,\*</sup> Pandi Muthirulan,<sup>j</sup> Shiao-Wei Kuo<sup>g,k\*</sup> and Devaraj Manoj<sup>a,b\*</sup>**

<sup>a</sup>Department of Chemistry, Karpagam Academy of Higher Education, Coimbatore- 641 021, India.

<sup>b</sup>Centre for Material Chemistry, Karpagam Academy of Higher Education, Coimbatore- 641021, India

<sup>c</sup>Department of Chemistry, Saveetha School of Engineering, Saveetha Institute of Medical and Technical Sciences, Chennai 602105, Tamil Nadu, India.

<sup>d</sup>School of Chemical Engineering, Yeungnam University, Gyeongsan 38541, Republic of Korea.

<sup>e</sup>Facultad de Ingenieria, Universidad Catolica de la Santissima Concepcion, Concepcion- 4090541, Chile

<sup>f</sup>Department of Physiology, Saveetha Institute of Medical and Technical Sciences, Chennai 600 077, India.

<sup>g</sup>Department of Materials and Optoelectronic Science, Center for Functional Polymers and Supramolecular Materials, National Sun Yat-Sen University, Kaohsiung 804, Taiwan.

<sup>h</sup>Department of Chemistry, Faculty of Science, Assiut University, Assiut 71515, Egypt.

<sup>i</sup>Department of Chemistry & Waterloo Institute for Nanotechnology, University of Waterloo, Waterloo, Ontario, Canada.

<sup>j</sup>Department of Chemistry, Lekshmipuram College of Arts and Science, Neyyoor-629802, India.

<sup>k</sup>Department of Medicinal and Applied Chemistry, Kaohsiung Medical University, Kaohsiung 807, Taiwan.

Corresponding Author: mgamal.eldin34@gmail.com (M. G. Mohamed), pkalambate@uwaterloo.ca (P. K. Kalambate) kuosw@faculty.nsysu.edu.tw (S. W. Kuo) and manojdvrj@gmail.com (D. Manoj, ORCID: 0000-0002-7451-4464)

<sup>#</sup>These authors equally contributed to this work.

## **Material Characterization**

To identify the crystal structure and phase composition of ZIF-8 and ZIF-8@Ti<sub>3</sub>C<sub>2</sub> MXene nanosheets, powder X-ray diffraction (XRD; Bruker D8-Advance) was carried out. The morphology of the prepared material was examined using an emission scanning Electron Microscope (FESEM; Carl Zeiss- Sigma 300); which is also assisted with an Energy-Dispersive X-Ray spectrometer (EDS) to carry out elemental and mapping analysis. To investigate the loading of ZIF-8 on Ti<sub>3</sub>C<sub>2</sub> nanosheets, Fourier Transform Infrared spectroscopy (FT-IR) analysis was carried out. The optical properties of reflectance, band gap analysis, and absorption were analyzed using Diffuse Reflectance Spectra (DRS; Double Beam Portable Jasco V750) with the help of a UV-Vis spectrophotometer. The photocatalytic performance of MB was investigated using a UV-Vis spectrophotometer within the wavelength range of 400-800 nm.

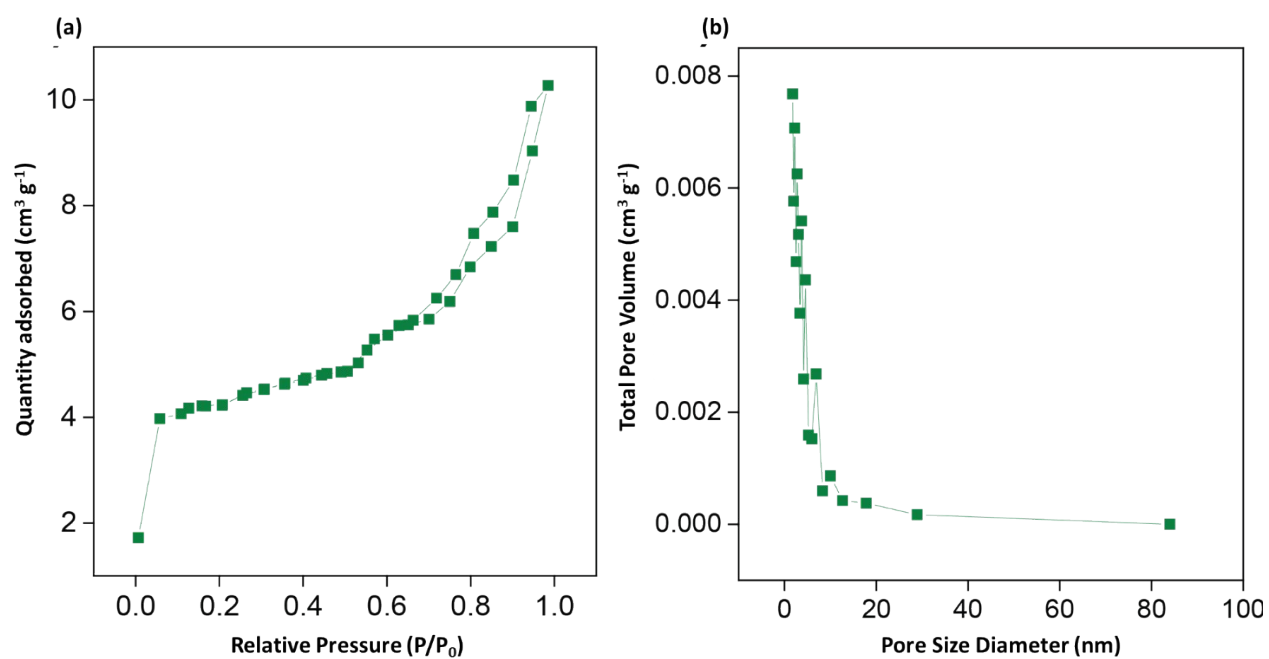

**Figure S1.** (a) Nitrogen adsorption/desorption isotherm for ZIF-8@MXene and (b) corresponding pore distribution.

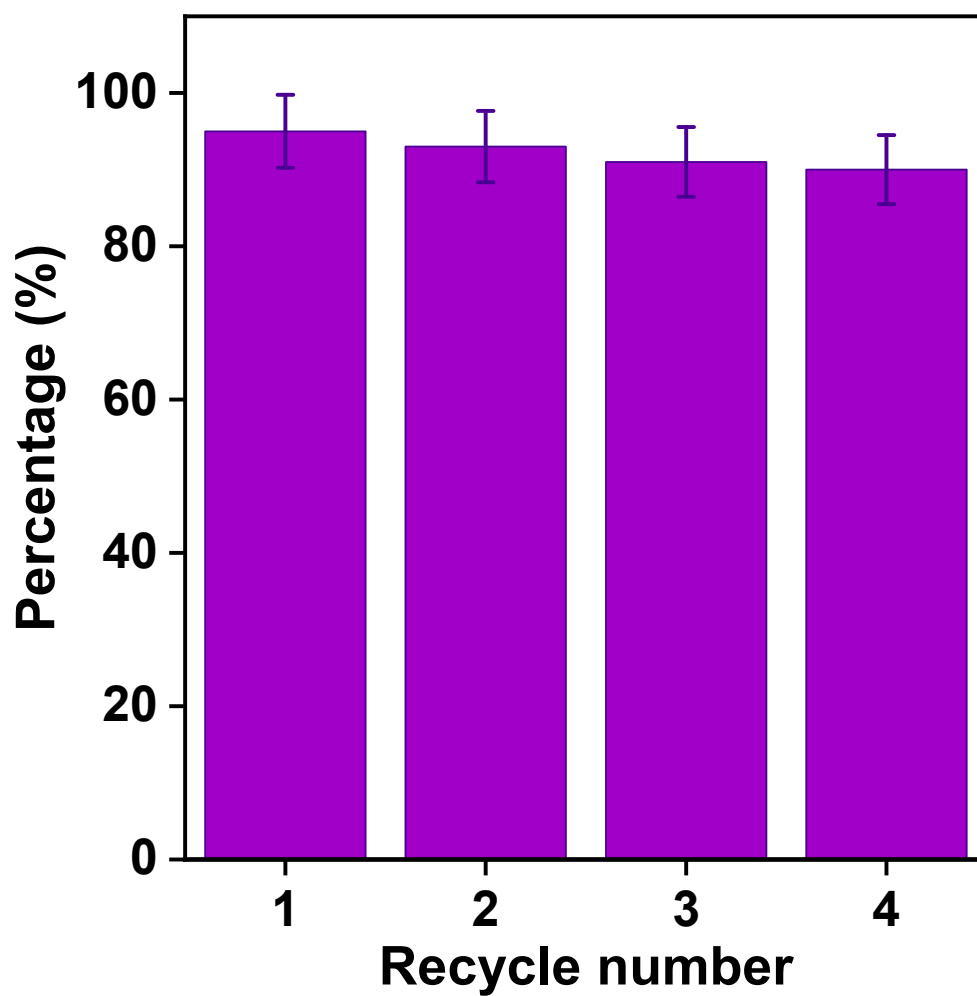

**Figure S2.** Effect of repeatability of ZIF-8@Ti<sub>3</sub>C<sub>2</sub> MXene as a photocatalyst for degradation of MB.

**Table S1.** Summarized the photocatalytic performance of ZIF-8@Ti<sub>3</sub>C<sub>2</sub> MXene nanosheets for methylene blue (MB) degradation compared to other reported materials.

| Catalyst                                   | Dye Degraded | Source of Light | Degradation efficiency | Reference |
|--------------------------------------------|--------------|-----------------|------------------------|-----------|
| ZIF-8@Ti <sub>3</sub> C <sub>2</sub> MXene | MB           | Visible light   | 95 %                   | This work |
| AgNPs@ZIF-8                                | MB           | Visible light   | 84.18 %                | S1        |
| (ZIF)-8-dot                                | MB           | Visible light   | 87 %                   | S2        |
| ZIF-8-AgNWs                                | MB           | Visible light   | 94 %                   | S3        |
| ZF-8@ZIF-67                                | MB           | Visible light   | 69 %                   | S4        |
| Ni-ZIF-8                                   | MB           | UV-LED light    | 93.22 %                | S5        |
| ZIF-8/LDO                                  | MB           | UV light        | 58 %                   | S6        |

## References

- [S1] R. Chandra and M. Nath. Controlled synthesis of AgNPs@ZIF-8 composite: Efficient heterogeneous photocatalyst for degradation of methylene blue and congo red. *J. Water Process Eng.* 2020, **36**, 101266. doi.org/10.1016/j.jwpe.2020.101266.
- [S2] A. A. Abd El Khalk, M. A. Betiha, A. S. Mansour, M. G. Abd El Wahed and A.M. Al-Sabagh. High degradation of methylene blue using a new nanocomposite based on zeolitic imidazolate Framework-8. *ACS Omega*, 2021, **6**, 26210–26220. doi.org/10.1021/acsomega.1c03195.
- [S3] Z. Tian, Z. Hou, X. Yang, L. Liu and W. Zhang. A Shell-Core Structure ZIF-8@AGNWS for enhanced photocatalytic degradation of methylene blue. *Adv. Eng. Mater.* 2023, **25**, 2201710. doi.org/10.1002/adem.202201710.

- [S4] E. S. Elmorsy, W. A. Amer, A. Mahrous and M. M. Ayad. Insight into the novel ZIF-8@N-CQDs/ZIF-67 nanocomposite for photocatalytic degradation of methylene blue under visible light irradiation. *Mater. Sci. Eng. B*, 2023, **298**, 116900. doi.org/10.1016/j.mseb.2023.116900.
- [S5] L. L. Zulfa, A. R. P. Hidayat, W. P. Utomo, R. Subagyo, E. N. Kusumawati, Y. Kusumawati, D. Hartanto, W. Widyastuti and R. Ediati. Facile synthesis of Ni-ZIF-8 with improved photodegradation performance for methylene blue. *Case Stud. Chem. Environ. Eng.* 2024, **10**, 100828. doi.org/10.1016/j.cscee.2024.100828.
- [S6] M. Hu, H. Lou, X. Yan, X. Hu, R. Feng and M. Zhou. In-situ fabrication of ZIF-8 decorated layered double oxides for adsorption and photocatalytic degradation of methylene blue. *Micropor. Mesopor. Mater.* 2018, **271**, 68–72. doi.org/10.1016/j.micromeso.2018.05.048.
